# Supplementary material for: Addition of T2-guided optical tomography improves noncontrast breast magnetic resonance imaging diagnosis
Source: Springer Nature journal article supplement (doi:10.1186/s13058-017-0902-x), 2017-10-24
Supplement: MOESM1 [file 15159948]

| Pat. ID | Pathology | Breast Density | Tumor Size (mm <sup>3</sup> ) | ROI Volume (mm <sup>3</sup> ) |       | Gray Scale Contrast |     | DCE |    |    | T2+DWI |    |    | DCE-NIRST | T2-NIRST |
|---------|-----------|----------------|-------------------------------|-------------------------------|-------|---------------------|-----|-----|----|----|--------|----|----|-----------|----------|
|         |           |                |                               | DCE                           | T2    | DCE                 | T2  | R1  | R2 | R3 | R1     | R2 | R3 |           |          |
| 1       | IDC       | HD             | 25×22×26                      | 4357                          | 3253  | 5.3                 | 4.9 | 0   | 1  | 1  | 1      | 1  | 1  | 2.4       | 1.1      |
| 2       | IDC       | S              | 10×25×25                      | 7412                          | 4744  | 5.0                 | 4.5 | 1   | 1  | 1  | 0      | 0  | 0  | 0.6       | 0.6      |
| 3       | IDC       | HD             | 9×16×16                       | 1626                          | 4975  | 5.0                 | 2.9 | 1   | 1  | 1  | 1      | 1  | 1  | 1.0       | 1.2      |
| 4       | IDC       | HD             | 11×16×14                      | 1297                          | 2553  | 18.9                | 2.5 | 1   | 1  | 1  | 1      | 1  | 1  | 5.3       | 1.7      |
| 5       | IDC       | S              | 11×17×23                      | 2082                          | 2441  | 7.7                 | 4.4 | 1   | 1  | 1  | 1      | 1  | 1  | 1.5       | 1.6      |
| 6       | IDC       | ED             | 23×40×70                      | 16304                         | 17352 | 7.1                 | 3.5 | 1   | 1  | 1  | 1      | 1  | 1  | 1.5       | 1.1      |
| 7       | IDC       | S              | 12×13×8                       | 5425                          | 4403  | 1.6                 | 2.7 | 1   | 1  | 0  | 1      | 1  | 0  | 1.1       | 1.2      |
| 8       | IDC       | S              | 35×46×74                      | 20452                         | 16134 | 7.0                 | 2.9 | 1   | 1  | 1  | 0      | 1  | 1  | 1.5       | 1.1      |
| 9       | IDC       | S              | 10×25×25                      | 1662                          | 1028  | 3.0                 | 5.6 | 1   | 1  | 1  | 0      | 0  | 0  | 1.1       | 3.3      |
| 10      | DC        | HD             | 21×18×25                      | 4846                          | 4740  | 7.2                 | 4.8 | 1   | 1  | 1  | 1      | 1  | 1  | 1.2       | 1.1      |
| 11      | IDC       | S              | 11×21×14                      | 3459                          | 1717  | 0.5                 | 3.9 | 1   | 1  | 1  | 1      | 1  | 1  | 1.5       | 2.8      |
| 12      | IDC       | S              | 15×25×42                      | 9477                          | 6871  | 7.7                 | 4.1 | 1   | 1  | 1  | 0      | 1  | 1  | 1.77      | 2.2      |
| 13      | IDC       | S              | 22×20×32                      | 8936                          | 4910  | 9.1                 | 4.6 | 1   | 1  | 1  | 1      | 1  | 1  | 1.6       | 1.4      |
| 14      | IDC       | HD             | 20×59×40                      | 20574                         | 14227 | 10.9                | 3.8 | 1   | 1  | 1  | 1      | 1  | 1  | 1.4       | 1.4      |
| 15      | IDC       | S              | 15×20×29                      | 2701                          | 2899  | 8.8                 | 4.5 | 1   | 1  | 1  | 1      | 1  | 1  | 5.3       | 1.7      |
| 16      | IDC       | F              | 20×27×33                      | 7102                          | 8989  | 16.6                | 3.5 | 1   | 1  | 1  | 1      | 1  | 1  | 4.5       | 3.0      |
| 17      | FA        | ED             | 10×20×19                      | 6340                          | 2591  | 2.1                 | 2.0 | 1   | 0  | 0  | 0      | 0  | 0  | 1.0       | 0.7      |

|    |    |    |                   |       |       |     |     |   |   |   |   |   |   |     |     |
|----|----|----|-------------------|-------|-------|-----|-----|---|---|---|---|---|---|-----|-----|
| 18 | AD | ED | RD                | 22154 | 14265 | 3.4 | 1.7 | 0 | 1 | 1 | 1 | 1 | 0 | 1.1 | 0.9 |
| 19 | FA | HD | 29×33× <b>58</b>  | 18344 | 13901 | 1.6 | 0.8 | 0 | 0 | 0 | 0 | 0 | 0 | 1.0 | 1.0 |
| 20 | FA | ED | 12×20× <b>21</b>  | 575   | 1292  | 3.6 | 2.3 | 0 | 0 | 0 | 0 | 0 | 0 | 0.7 | 0.8 |
| 21 | IP | HD | 6×7× <b>9</b>     | 1160  | 1447  | 3.4 | 2.6 | 1 | 1 | 1 | 0 | 0 | 0 | 1.3 | 1.1 |
| 22 | AD | S  | 15×18× <b>26</b>  | 3646  | 2370  | 0.4 | 4.5 | 0 | 1 | 1 | 0 | 0 | 1 | 1.0 | 1.1 |
| 23 | FA | ED | <b>27</b> ×25×17  | 4861  | 4291  | 6.4 | 3.9 | 0 | 0 | 0 | 0 | 0 | 0 | 1.0 | 0.9 |
| 24 | CH | ED | 21× <b>34</b> ×26 | 13646 | 13668 | 0.9 | 4.7 | 0 | 0 | 0 | 0 | 0 | 0 | 0.9 | 0.5 |

Pathological result: IDC: Invasive Ductal Carcinoma; FA: Fibroadenoma; AD: Adenosis;  
 IP: Intraductal Papilloma; CH: Cystic Hyperplasia;  
Breast density: S: Scattered; ED: Extremely Dense; HD: Heterogeneously Dense; F: Fatty;  
Size: RD: Regional Distribution;  
Radiologists: R1: Dr. Xu; R2: Dr. Lu; R3: Dr. Wang
